# Supplementary material for: Naphthaldehyde-based Schiff base dyes: aggregation-induced emission and high-contrast reversible mechanochromic luminescence
Source: Royal Society of Chemistry journal article supplement (doi:10.1039/d2qm00542e), 2022-01-01
Supplement: d2qm00542e1.pdf [file d2qm00542e1.pdf]

## Electronic Supplementary Information

# Naphthaldehyde-based Schiff Base Dyes: Aggregation-induced Emission and High-contrast Reversible Mechanochromic Luminescence

Lingyi Shen,<sup>‡a</sup> Chang-Jin Yu,<sup>‡a</sup> Hai-Fang Xie,<sup>a</sup> Na Xu,<sup>a</sup> Hong Xu,<sup>a</sup> Ya-Li Huang,<sup>a</sup> Carl Redshaw,<sup>\*b</sup> Xing Feng<sup>\*c</sup> and Qi-Long Zhang<sup>\*a</sup>

<sup>a</sup> Research Center for Molecular Medical Engineering, School of Basic Medical Science, Guizhou Medical University, Guiyang 550004, China. [gzuqlzhang@126.com](mailto:gzuqlzhang@126.com)

<sup>b</sup> Department of Chemistry, University of Hull, Cottingham Road, Hull, Yorkshire HU6 7RX, UK. [c.redshaw@hull.ac.uk](mailto:c.redshaw@hull.ac.uk)

<sup>c</sup> Guangdong Provincial Key Laboratory of Functional Soft Condensed Matter, School of Material and Energy, Guangdong University of Technology, Guangzhou 510006, P. R. China. [hyxhn@sina.com](mailto:hyxhn@sina.com)

<sup>‡</sup> These authors contributed equally to this work.

### Table and Contents

|                                                                                                                                 |    |   |
|---------------------------------------------------------------------------------------------------------------------------------|----|---|
| Experimental Section.....                                                                                                       | S1 | 3 |
| Fig. S1 <sup>1</sup> H NMR spectrum of probe HNP                                                                                |    | 3 |
| Fig. S2 <sup>13</sup> C NMR spectrum of probe HNP                                                                               |    | 4 |
| Fig. S3 HR ESI-MS spectrum of probe HNP                                                                                         |    | 4 |
| Fig. S4 Absorption (Abs.) and fluorescence (PL) spectra of HNP in different solution                                            |    | 5 |
| Fig. S5 UV-vis absorption of the probe at different water content in THF.                                                       |    | 5 |
| Fig. S6 Fluorescence (PL) spectra of HNP at different water content                                                             |    | 5 |
| Fig. S7 Absorption (Abs.) and fluorescence (PL) spectra of HNP in different pH.                                                 |    | 6 |
| Fig. S8 The solid UV-vis absorption spectra of HNP-y and when ground and fuming.                                                |    | 6 |
| Fig. S9 ORTEP diagram of HNP-r HNP-y and HNP-r                                                                                  |    | 7 |
| Fig. S10 The XRD patterns of HNP-y and HNP-r powders, and the simulated XRD patterns of HNP-y and HNP-r crystals.               |    | 7 |
| Fig. S11 Bar diagram of the competitive experiments of various metal                                                            |    | 8 |
| Fig. S12 UV-visible absorption spectra and fluorescence emission spectra of different concentrations of Cu <sup>2+</sup> on HNP |    | 9 |

|                                                                                           |    |
|-------------------------------------------------------------------------------------------|----|
| Fig. S13 Job's plot of HNP and Cu <sup>2+</sup> in THF solution                           | 9  |
| Fig. S14 Linear fitting of the emission data upon addition of Cu <sup>2+</sup>            | 10 |
| Fig. S15 The Benesi–Hildebrand plot of 1/(F-F <sub>0</sub> ) versus 1/[Cu <sup>2+</sup> ] | 11 |
| Fig. S16 ORTEP diagram of HNP-Cu and 1D columnar structure of HNP-Cu                      | 11 |
| Table S1 Crystallographic data and refinement details                                     | 12 |
| Supplementary References.....S2                                                           | 12 |

---

## S1. Experimental section

**Synthesis of HNP:** *N,N'*-(2-aminophenyl)-2,6-dicarboxylimide pyridine (0.347 g, 1 mmol) which was synthesized according to the literature method was dissolved in 50 mL methanol and 2-hydroxy-1-naphthaldehyde (0.350 g, 2 mmol) was added. After stirring for 10 minutes, 10  $\mu$ L  $\text{H}_2\text{SO}_4$  was drip added to the resulting mixture. Stirring was continued for 8 h at room temperature to afford a red precipitate. The resulting red precipitate was collected by filtration to give the compound **HNP**. (0.510 g, 78%). On the other hand, 60  $\mu$ L  $\text{H}_2\text{SO}_4$  was drip added to the reaction mixture, following given a yellow product.  $^1\text{H}$  NMR (400 MHz,  $\text{CDCl}_3$ -TMS, 298 K):  $\delta$ /ppm 16.03 (s, 1H, naphthyl-OH), 16.02 (s, 1H, naphthyl-OH), 10.60 (s, 2H, NH), 8.61 (s, 1H, CH=N), 8.59 (s, 1H, CH=N), 8.33 (d,  $J$ = 8.0 Hz, 2H, Py-H), 8.30 (d,  $J$ = 4.0 Hz, 2H, naphthyl-H), 8.19 (t,  $J$ = 8.0 Hz, 1H, Py-H), 7.61 (d,  $J$ = 7.6 Hz, 2H, Ph-H), 7.42 (t,  $J$ = 7.6 Hz, 2H, Ph-H), 7.34 (m, 2H, naphthyl-H), 7.29 (d, 4H,  $J$ = 4.0 Hz naphthyl-H), 7.25 (d, 2H,  $J$ = 8.0 Hz, naphthyl-H), 7.17 (t,  $J$ = 8.0 Hz, 2H, Ph-H), 6.85 (d, 2H,  $J$ = 4.0 Hz naphthyl-H), 6.17 (d, 2H,  $J$ = 8.0 Hz, Ph-H). ESI-MS  $m/z$ : calcd. for  $[\text{C}_{41}\text{H}_{29}\text{N}_5\text{O}_4+\text{H}]^+$ , 656.2292; found, 656.2291. M.p.: 274–275 $^\circ\text{C}$ .

**Synthesis of HNP-Cu:**  $\text{CuCl}_2$  (0.135 g, 1 mmol) was added to a stirred solution of **HNP** (0.328 g, 0.5 mmol) in methanol (60 mL), and the mixture was stirred for 2 h. The resulting brown precipitate was collected by filtration. The filtrate was recrystallized from methanol. X-ray quality brown single crystals of **HNP-Cu** were obtained by slow evaporation of a saturated methanol solution.

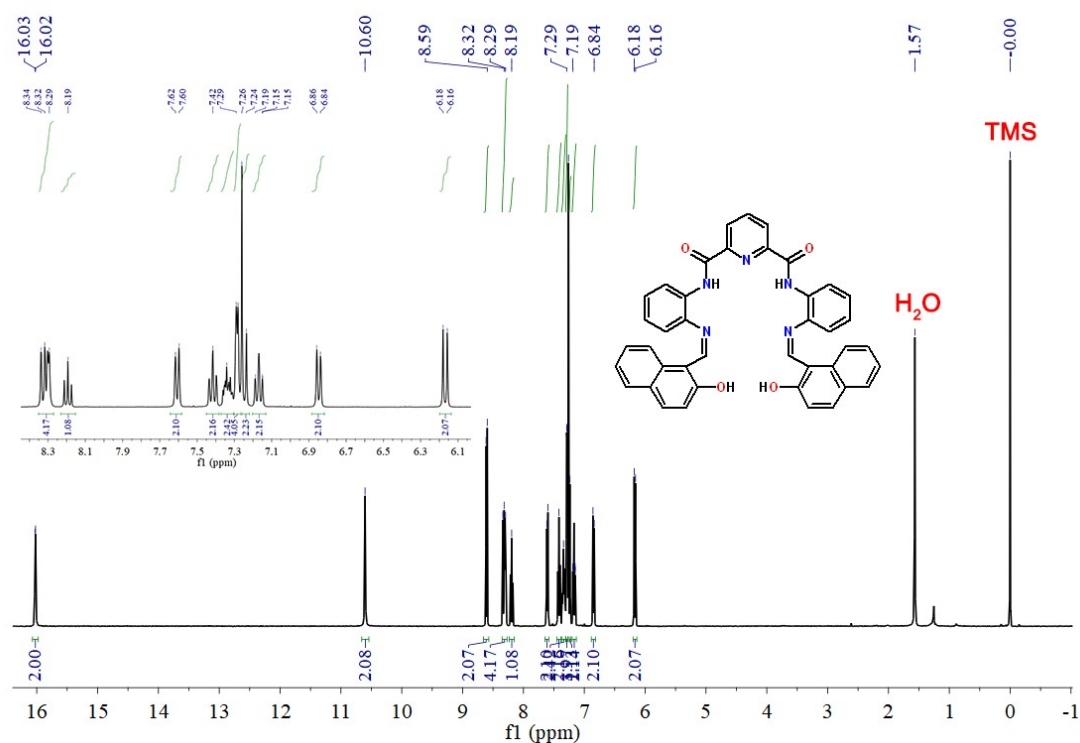

**Fig. S1**  $^1\text{H}$  NMR (400 MHz,  $\text{CDCl}_3$ , 298 K) of probe **HNP**.

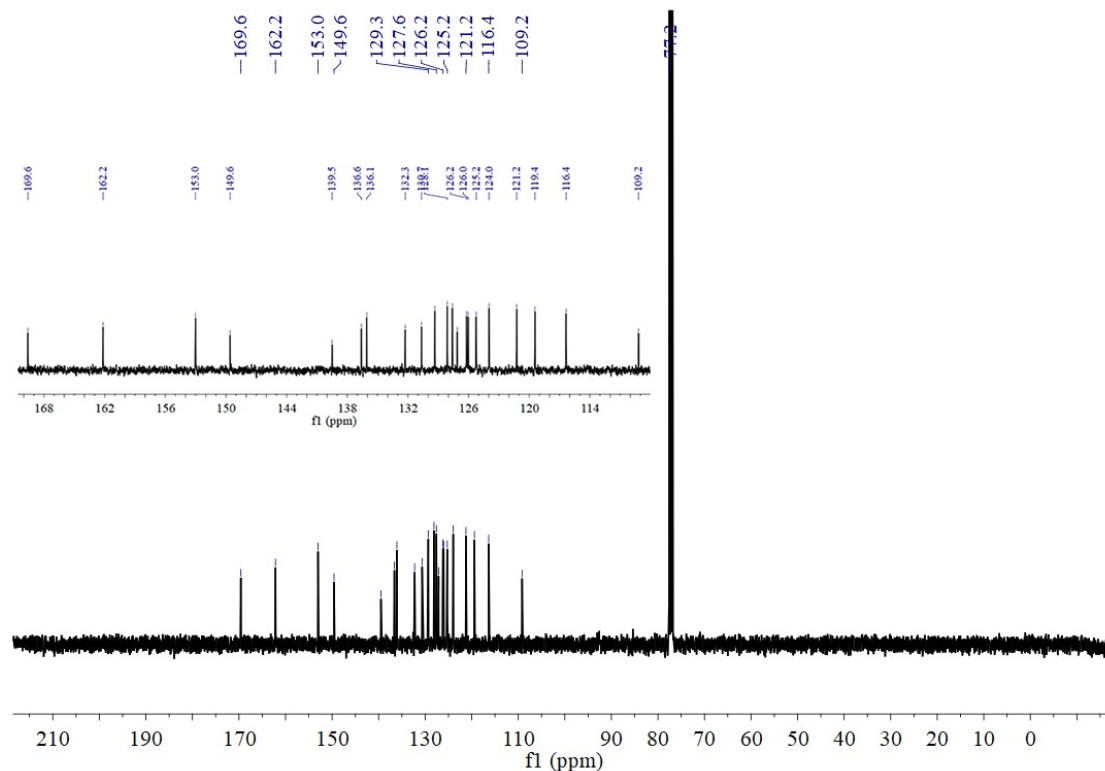

**Fig. S2**  $^{13}\text{C}$  NMR (400 MHz,  $\text{CDCl}_3$ , 298 K) of probe HNP.

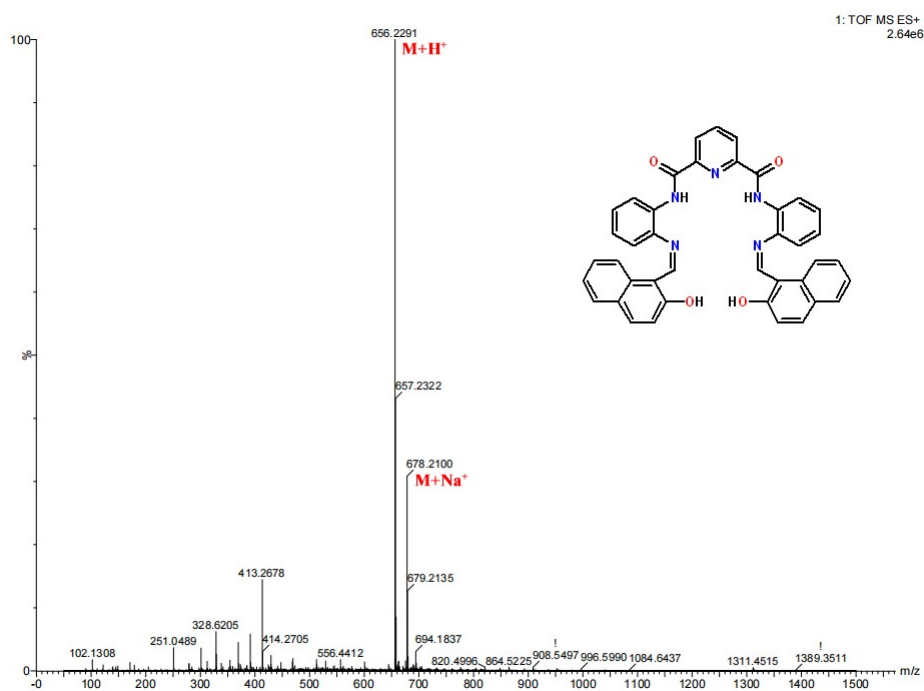

**Fig. S3** HR ESI-MS spectrum of probe HNP.

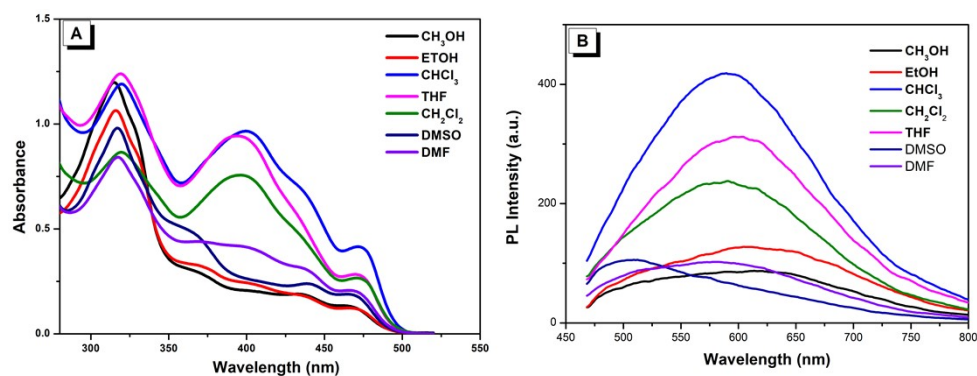

**Fig. S4** Absorption (Abs.) and fluorescence (PL) spectra of **HNP** in different solvents.

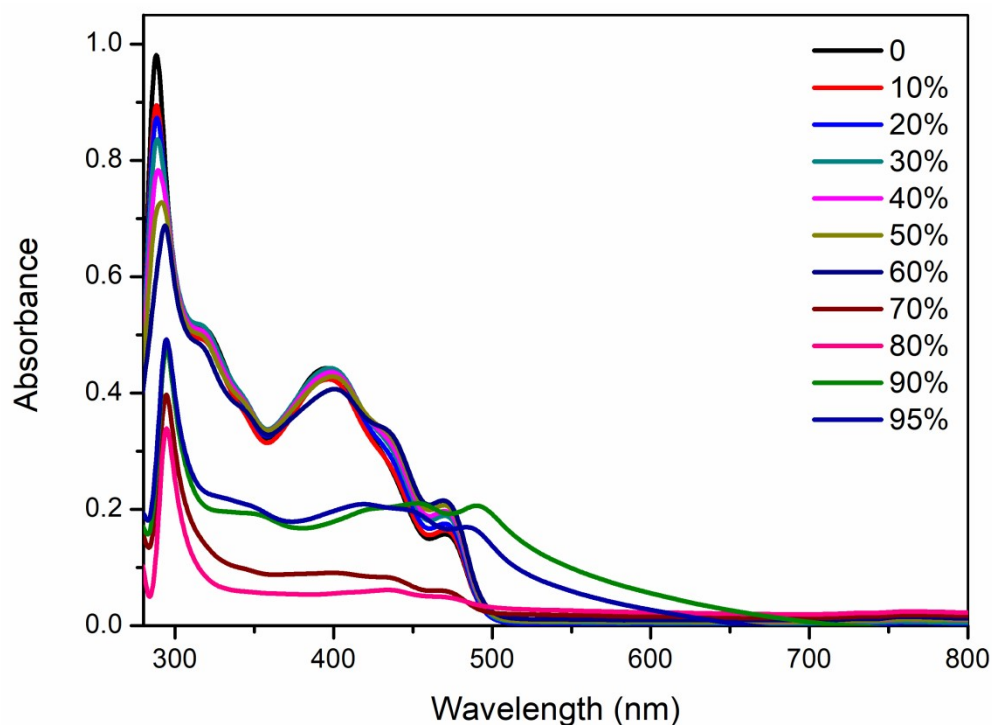

**Fig. S5** UV-vis absorption of the probe ( $2.00 \times 10^{-5}$  mol/L) at different water content in THF.

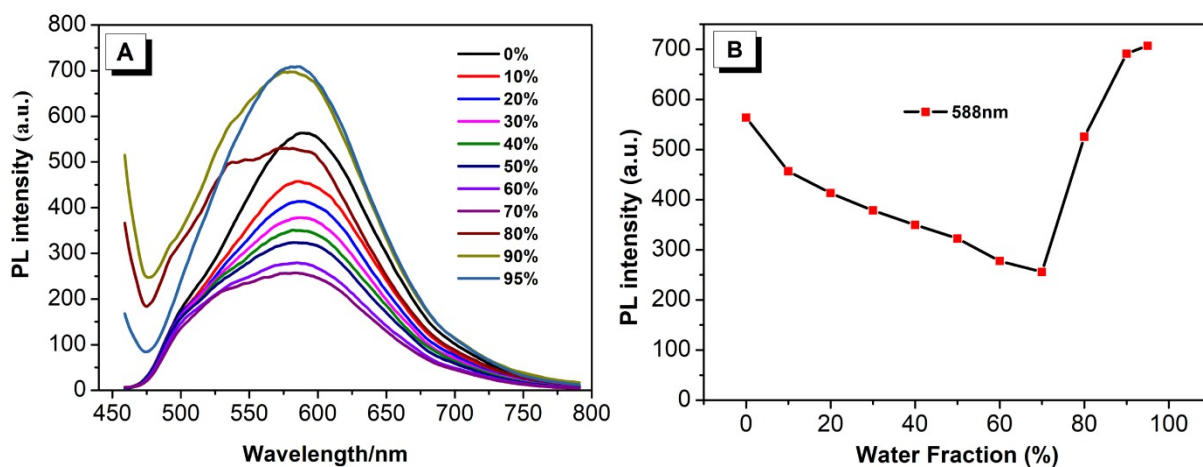

**Fig. S6** (a) Fluorescence spectra of the fluorescent probe ( $5.00 \times 10^{-5}$  mol/L) at different water content ( $\lambda_{\text{ex}} = 440$  nm) in THF. (b) Effect of water volume fraction on fluorescence probe at 588 nm.

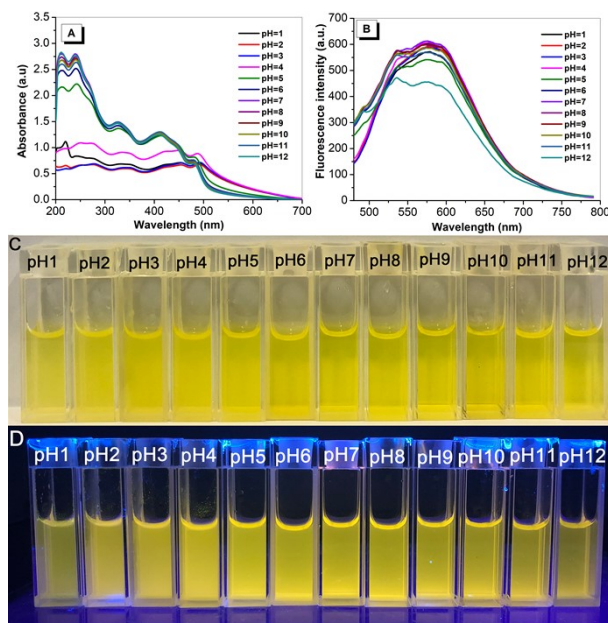

**Fig. S7** Absorption (Abs.) and fluorescence (PL) spectra of **HNP** ( $5.00 \times 10^{-5}$  mol/L,  $V_{\text{THF}}/V_{\text{water}} = 1/9$ , Tris-HCL buffer) in different pH.

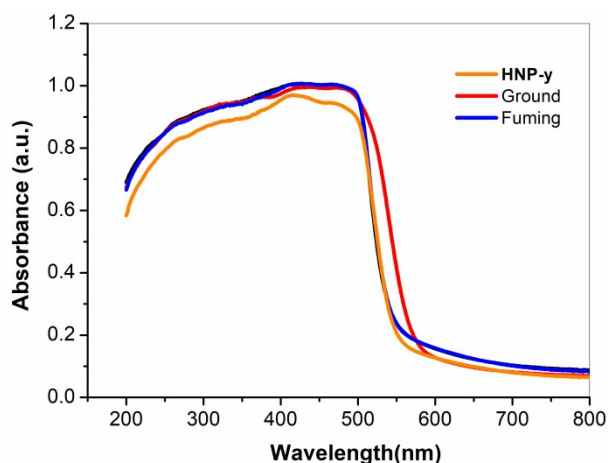

**Fig. S8** UV-vis solid absorption spectra of **HNP-y** and when ground and fuming.

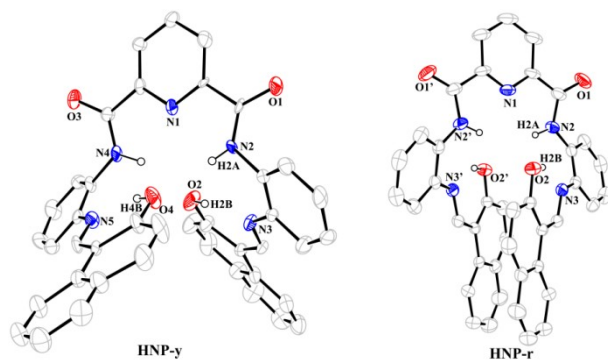

**Fig. S9** ORTEP diagram of **HNP-y** and **HNP-r** (Thermal ellipsoids are set at the 30% probability level and some hydrogen atoms and solvent molecules were omitted for clarity).

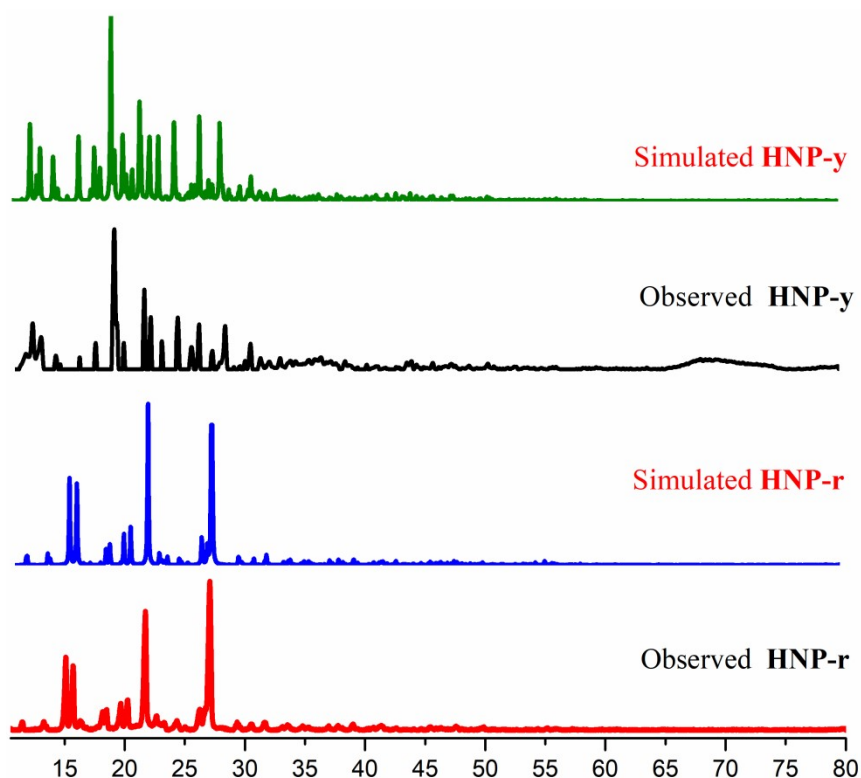

**Fig. S10** The XRD patterns of HNP-y and HNP-r powders, and the simulated XRD patterns of HNP-y and HNP-r crystals.

#### Interaction time between fluorescent probe and $\text{Cu}^{2+}$

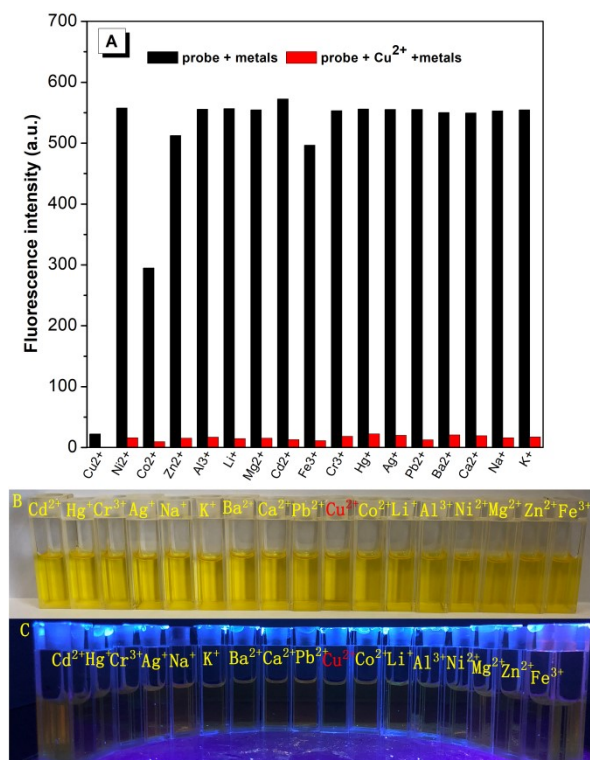

**Fig. S11** Bar diagram of the competitive experiments of various metal. ( $\lambda_{\text{ex}}/\lambda_{\text{em}} = 440 \text{ nm}/588 \text{ nm}$ ).

Under the same conditions, fluorescence titration experiments with  $\text{Cu}^{2+}$  were carried out. Experimental process: In THF solution, the fixed probe concentration was  $5.00 \times 10^{-5}$  mol/L, and different concentrations of  $\text{Cu}^{2+}$  were added respectively. After shaking, the UV-visible absorption spectrum and fluorescence spectrum were recorded. Results: As shown in Fig. S12, in THF solution, the absorbance of the probe at 396 nm gradually decreased with the increase of  $\text{Cu}^{2+}$  concentration, meanwhile, a new absorbance at 443 nm gradually increased. Moreover, the fluorescence intensity of the probe decreased gradually at 588 nm, and the fluorescence quenching rate reached 95.35% when two equivalents  $\text{Cu}^{2+}$  were added. Based on the UV titration experiments and the fluorescence titration experiments, the ratio between the probe and  $\text{Cu}^{2+}$  is 1:2.

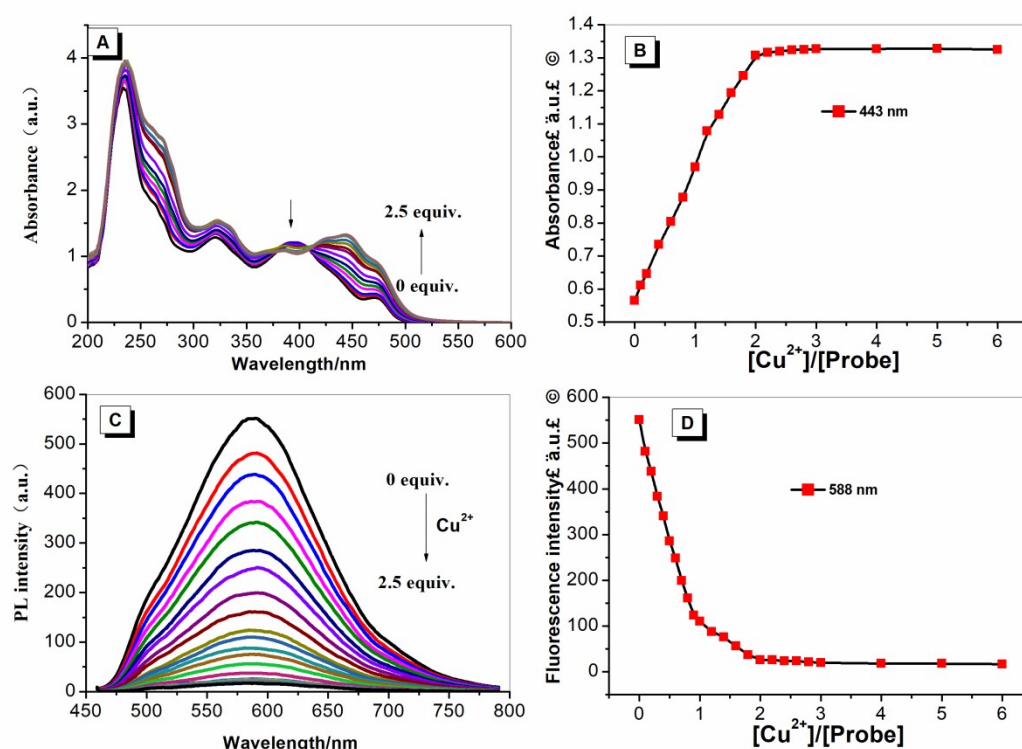

**Fig. S12** UV-visible absorption spectra of different concentrations of  $\text{Cu}^{2+}$  on fluorescence probe; (B) UV-visible line diagram of  $N_{\text{Cu}^{2+}}/N_{\text{probe}}$  system at 443nm; (C) Fluorescence spectra of different concentrations of  $\text{Cu}^{2+}$  on fluorescence probes; (D) fluorescence line chart of  $N_{\text{Cu}^{2+}}/N_{\text{probe}}$  system at 588nm.



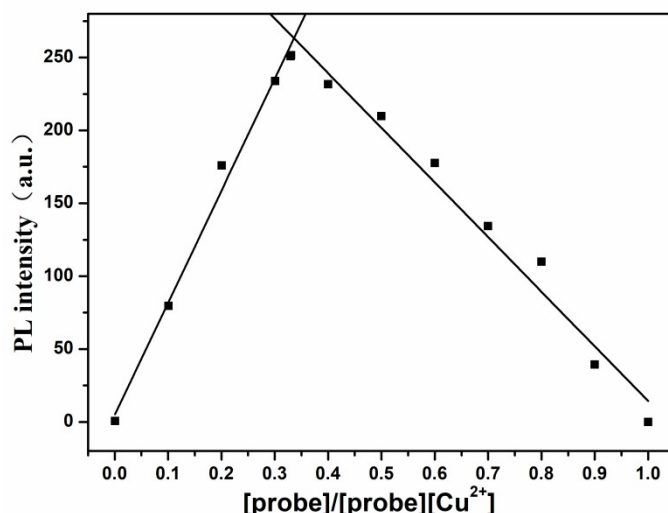

**Fig. S13** Job's plot for the determination of the stoichiometry of **HNP** and  $\text{Cu}^{2+}$  in THF solution, the total concentration of **L** and  $\text{Cu}^{2+}$  was 100  $\mu\text{M}$ .

#### Determination of detection limits

The detection limit of probe **HNP** for  $\text{Cu}^{2+}$  can also be obtained through the fluorescence titration experiments of  $\text{Cu}^{2+}$ . Under the same conditions, 10 groups of blank experiments were carried out first, that is, only probe ( $5.0 \times 10^{-6}$  mol/L) was added without  $\text{Cu}^{2+}$ , and the fluorescence value at wavelength 588 nm was calculated as 0.55. Then 10 points in  $\text{Cu}^{2+}$  fluorescence titration experiments where the fluorescence decreased with the increase of  $\text{Cu}^{2+}$  concentration were taken, and the calibration curve of fluorescence intensity change of probe with  $\text{Cu}^{2+}$  concentration was made. The fluorescence intensity of the system was linearly correlated with the concentration of  $\text{Cu}^{2+}$  over the range  $5.0 \times 10^{-6}$  mol/L to  $4.5 \times 10^{-5}$  mol/L, with a correlation coefficient  $R^2=0.99487$  ( $n=10$ ). The linear equation  $y=Ax+b$  can be obtained from Fig. S14, where  $a=-9.39289 \times 10^6$ ,  $b=532.44855$ ; then according to the formula: detection limit =  $3\text{SD}/S$ ,  $S$  is the slope, that is  $A$ , so it can be concluded that the detection limit is  $1.8 \times 10^{-7}$  mol/L.

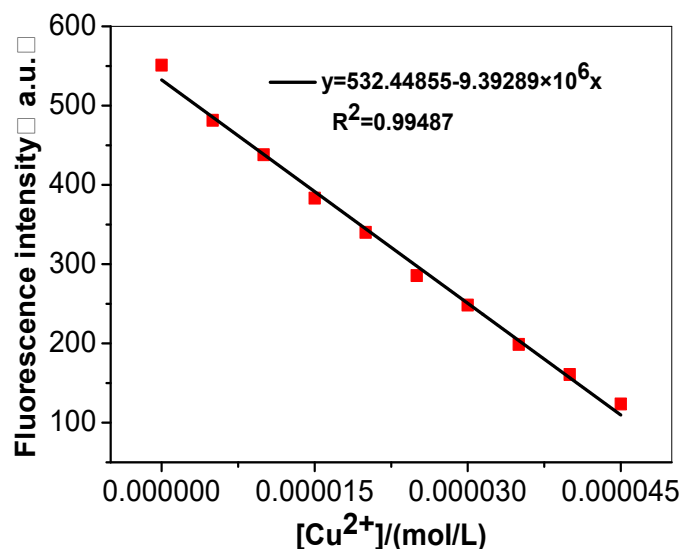

**Fig. S14** Linear fitting of the emission data upon addition of Cu<sup>2+</sup>.

#### Determination of binding constants

The binding constant  $K_a$  was calculated from the experimental results of the fluorescence titrations. In the fluorescence titration experiments for Cu<sup>2+</sup>, the fluorescence decreased with the increase of Cu<sup>2+</sup> concentration at 4-10 points, and then according to the Benesi-Hildebrand equation  $F - F_0 = \Delta F = [Cu^{2+}](F_{max} - F_0) / (1/K_a + [Cu^{2+}])$ , we can calculate the binding constant  $K_a$  between the probe and Cu<sup>2+</sup>, where  $F$  represents the fluorescence intensity at wavelength 588nm with a specific Cu<sup>2+</sup> concentration,  $F_0$  represents the fluorescence intensity at wavelength 588 nm without Cu<sup>2+</sup> addition, and  $F_{max}$  represents the minimum fluorescence intensity at wavelength 588 nm in the Cu<sup>2+</sup> titration experiments. As shown in Fig. S15, a linear graph was made with  $1/[Cu^{2+}]$  as abscissa and  $1/(F - F_0)$  as ordinate, and the linear equation  $y = Ax + b$  was obtained, and then combined with the Benesi-Hildebrand equation, and the final binding constant is  $K_a = B/A = -4.76003 \times 10^{-4} / -8.35374 \times 10^{-8} = 5.6980 \times 10^3$  mol/L.

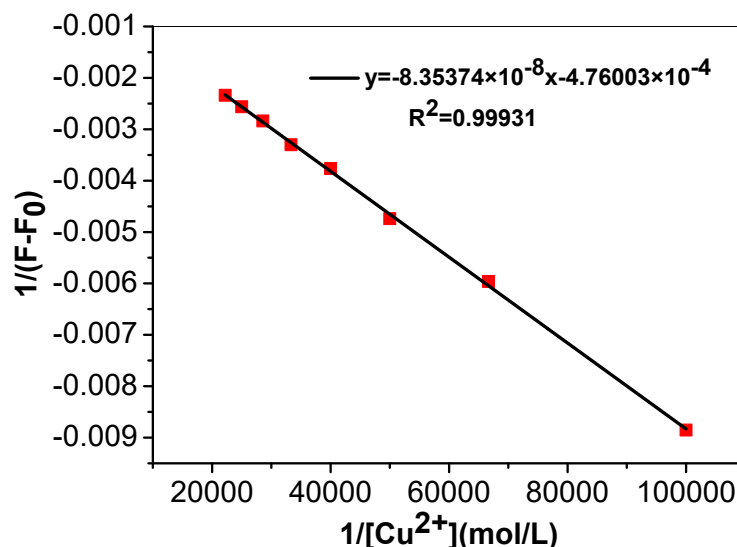

**Fig. S15** The Benesi–Hildebrand plot of  $1/(F-F_0)$  versus  $1/[\text{Cu}^{2+}]$ .

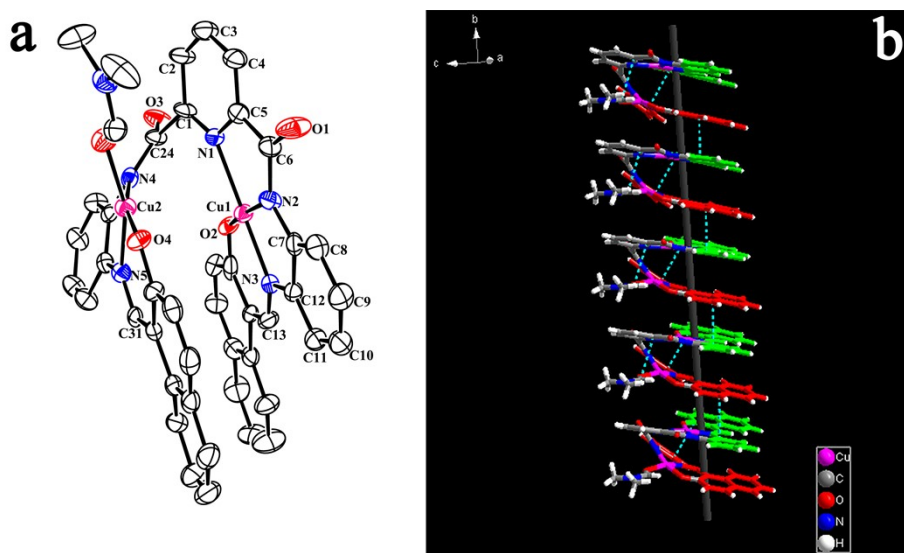

**Fig. S16** (a) ORTEP diagram of **HNP-Cu**. (Thermal ellipsoids are set at the 30% probability level and all hydrogen atoms and solvent molecules were omitted for clarity). (b) 1D columnar structure of **HNP-Cu**. The blue dotted lines indicate the intermolecular  $\pi \cdots \pi$  interactions and intramolecular hydrogen bond interactions.

**X-ray crystal structure determination.** X-ray diffraction data for compounds **HNP-y**, **HNP-r** and **HNP-Cu** were collected on a Bruker SMART APEX II diffractometer at room temperature (297 K) with graphite-monochromated Mo  $K\alpha$  radiation ( $\lambda = 0.71073 \text{ \AA}$ ). An empirical absorption correction using SADABS was applied for all data.<sup>2</sup> The structures were solved and refined to convergence on  $F^2$  for all independent reflections by the full-matrix least squares method using the SHELXL-2014 programs<sup>3</sup> and OLEX2 1.2.<sup>4</sup> CCDC: 2174338, **HNP-y**; 2174339, **HNP-r** and 2174340, **HNP-Cu**: contain the supplementary crystallographic data for this paper. These data can be obtained free of charge from the Cambridge Crystallographic Data Centre [www.ccdc.cam.ac.uk/data\\_request/cif](http://www.ccdc.cam.ac.uk/data_request/cif)

**Table S1.** Crystallographic data and refinement details for **HNP-y**, **HNP-r** and **HNP-Cu**.

| Parameter                                                                                         | HNP-y                                                         | HNP-r                                                         | HNP-Cu                                                                        |
|---------------------------------------------------------------------------------------------------|---------------------------------------------------------------|---------------------------------------------------------------|-------------------------------------------------------------------------------|
| CCDC Number                                                                                       | 2174338                                                       | 2174339                                                       | 2174340                                                                       |
| Formula                                                                                           | C <sub>41</sub> H <sub>29</sub> N <sub>5</sub> O <sub>4</sub> | C <sub>41</sub> H <sub>29</sub> N <sub>5</sub> O <sub>4</sub> | C <sub>44</sub> H <sub>32</sub> Cu <sub>2</sub> N <sub>6</sub> O <sub>5</sub> |
| Formula weight                                                                                    | 655.69                                                        | 655.69                                                        | 851.83                                                                        |
| Crystal system,                                                                                   | Triclinic                                                     | Monoclinic                                                    | Orthorhombic                                                                  |
| space group                                                                                       | <i>P</i> -1                                                   | <i>C</i> 2/ <i>c</i>                                          | <i>Pna</i> 2 <sub>1</sub>                                                     |
| <i>a</i> /Å                                                                                       | 8.865(4)                                                      | 18.257(3)                                                     | 24.656(6)                                                                     |
| <i>b</i> /Å                                                                                       | 12.406(5)                                                     | 15.436(3)                                                     | 7.0427(15)                                                                    |
| <i>c</i> /Å                                                                                       | 14.817(6)                                                     | 13.494(3)                                                     | 42.311(10)                                                                    |
| $\alpha$ /deg                                                                                     | 84.607(18)                                                    | 90                                                            | 90                                                                            |
| $\beta$ /deg                                                                                      | 86.15(2)                                                      | 122.871(4)                                                    | 90                                                                            |
| $\gamma$ /deg                                                                                     | 86.94(2)                                                      | 90                                                            | 90                                                                            |
| <i>V</i> /Å <sup>3</sup>                                                                          | 1616.8(12)                                                    | 3194.0(11)                                                    | 7347(3)                                                                       |
| <i>Z</i>                                                                                          | 2                                                             | 4                                                             | 8                                                                             |
| <i>D</i> <sub>calcd</sub> /g cm <sup>-3</sup>                                                     | 1.347                                                         | 1.364                                                         | 1.540                                                                         |
| <i>F</i> (000)                                                                                    | 684.0                                                         | 1368.0                                                        | 3488.0                                                                        |
| $\mu$ /mm <sup>-1</sup>                                                                           | 0.089                                                         | 0.090                                                         | 1.216                                                                         |
| 2 $\theta$ range                                                                                  | 5.226–49.998                                                  | 5.278–49.996                                                  | 5.074–49.998                                                                  |
| Independent reflections                                                                           | 5675                                                          | 12239                                                         | 12126                                                                         |
| <i>R</i> <sub>int</sub>                                                                           | 0.2172                                                        | 0.1124                                                        | 0.0935                                                                        |
| Final <i>R</i> <sub>1</sub> , <i>wR</i> <sub>2</sub> values ( <i>I</i> > 2 $\sigma$ ( <i>I</i> )) | 0.1785, 0.3989                                                | 0.0629, 0.1169                                                | 0.0625, 0.1572                                                                |
| <i>R</i> <sub>1</sub> , <i>wR</i> <sub>2</sub> (all data)                                         | 0.3157, 0.4497                                                | 0.1507, 0.1409                                                | 0.1061, 0.1794                                                                |
| GOF ( <i>F</i> <sup>2</sup> )                                                                     | 1.244                                                         | 0.937                                                         | 1.026                                                                         |

## S2. Supplemental References

1. H.-F. Xie, C.-J. Yu, Y.-L. Huang, H. Xu, Q.-L. Zhang, X.-H. Sun, X. Feng, C. Redshaw, A turn-off fluorescent probe for the detection of Cu<sup>2+</sup> based on a tetraphenylethylene-functionalized salicylaldehyde Schiff-base. *Mater. Chem. Front.*, 2020, **4**, 1500-1506.
2. G. M. Sheldrick, Program SADABS: Area-Detector Absorption Correction, University of Göttingen, Germany. 1996.
3. G. M. Sheldrick, *Acta Crystallogr., Sect. C: Cryst. Struct. Commun.* 2015, **71**, 3-8.
4. O. V. Dolomanov, L. J. Bourhis, R. J. Gildea, J. A. K. Howard and H. J. Puschmann, *Appl. Cryst.*, 2009, **42**, 339-341.
